# Supplementary material for: GHOSH v1.0.0: a novel Gauss-Hermite High-Order Sampling Hybrid filter for computationally efficient data assimilation in geosciences
Source: Copernicus journal article supplement (doi:10.5194/gmd-2023-170), 2023-11-21
Supplement: Supplementary file [file gmd-2023-170-AC4-supplement.zip]

Then, the real numbers  $u_{m,j}$  and  $v_j$ , with  $j \in \{1, \dots, s\}$  and  $m \in \{1, \dots, r+1\}$ , are calculated as a solution of the nonlinear system

$$\begin{cases} \vdots \\ \sum_{m=1}^{r+1} u_{m,j_1} \cdots u_{m,j_\xi} v_m^{2-\xi} = \mu_{j_1, \dots, j_\xi} \\ \vdots \end{cases} \quad (1)$$

- 5 with one equation for each  $\xi \in \{0, \dots, h\}$  and for each  $j_1, \dots, j_\xi \in \{1, \dots, s\}$ , for a total of  $(s^{h+1} - 1) / (s - 1)$  equations. The system represents the matching between the statistical moments of the ensemble and the normalized uncertainty pdf. In fact, its first equation, i.e.,

$$\sum_{m=1}^{r+1} v_m^2 = 1,$$

ensures that the weights will sum to 1; the following block of  $s$  equations, i.e.,

$$\begin{cases} \sum_{m=1}^{r+1} u_{m,1} v_m = 0 \\ \vdots \\ \sum_{m=1}^{r+1} u_{m,s} v_m = 0, \end{cases}$$

- 10 ensures that the ensemble has 0-mean; the third block of  $s^2$  equations, i.e.,

$$\begin{cases} \sum_{m=1}^{r+1} u_{m,1} u_{m,1} = \delta_{1,1} = 1 \\ \vdots \\ \sum_{m=1}^{r+1} u_{m,1} u_{m,s} = \delta_{1,s} = 0 \\ \vdots \\ \sum_{m=1}^{r+1} u_{m,s} u_{m,1} = \delta_{s,1} = 0 \\ \vdots \\ \sum_{m=1}^{r+1} u_{m,s} u_{m,s} = \delta_{s,s} = 1, \end{cases}$$

- 15 forces the ensemble covariance matrix to be equal to the identity matrix, and so on and so forth. The general equation reported in system (1) represents all the moment-matching equations up to order  $h$ , where  $\mu_{j_1, \dots, j_\xi}$  are the statistical moments of a  $s$ -dimensional probability distribution that approximates the assumed error distribution shape. Such probability distribution must be uncorrelated, normalized and have 0 mean, since the ensemble mean and covariance will be later adjusted by the sampling algorithm, which will also rescale the other moments accordingly (see equation (6)).
